# Supplementary material for: Structure of the fimbrial protein Mfa4 from Porphyromonas gingivalis in its precursor form: implications for a donor-strand complementation mechanism
Source: PubMed Central journal article supplement (PMC4789730; doi:10.1038/srep22945), 2016-03-14
Supplement: srep22945-s1.pdf [file srep22945-s1.pdf]

*Supplementary information*

**Structure of the fimbrial protein Mfa4 from *Porphyromonas gingivalis* in its precursor form: implications for a donor-strand complementation mechanism**

Patrik Kloppsteck<sup>1</sup>, Michael Hall<sup>1</sup>, Yoshiaki Hasegawa<sup>2</sup> and Karina Persson<sup>1\*</sup>

<sup>1</sup>Department of Chemistry, Umeå University, Umeå, Sweden, SE-901 85

<sup>2</sup>Department of Microbiology, School of Dentistry, Aichi Gakuin University, 1-100 Kusumoto-cho, Chikusa-ku, Nagoya, Aichi 464-8650, Japan

\*Correspondence to Karina Persson, Department of Chemistry, Umeå University, SE-90185 Umeå, Sweden, email: karina.persson@chem.umu.se

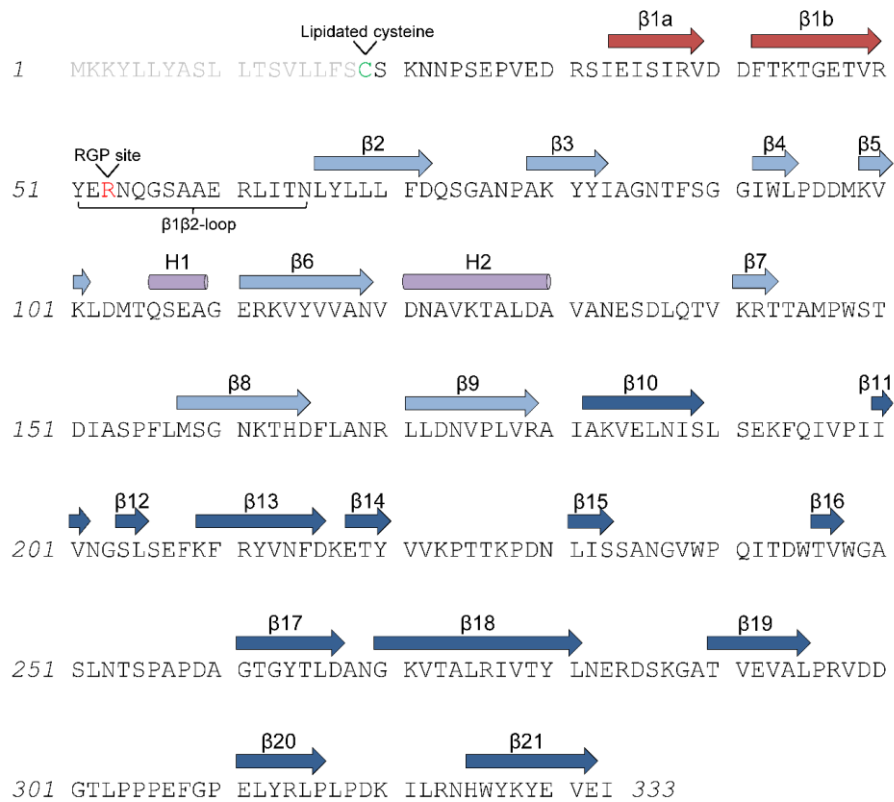

**Supplementary figure S1.** Sequence and secondary structure of Mfa4. Helices are depicted as cylinders and strands as arrows. The lipitated cysteine, Cys19, and the RGP recognition site, Arg53 are indicated in green and red, respectively

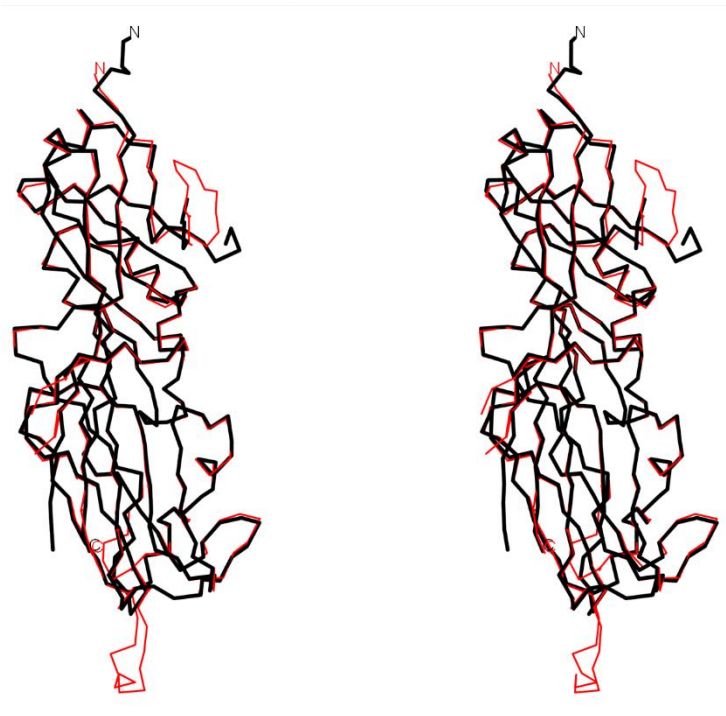

**Supplementary figure S2.** Comparison of Mfa4 and PG0181. Superposition of Mfa4 from strain ATCC 33277 and PG0181 from strain W83 (PDB code 4rdb). Mfa4 is colored red and PG0181 black. The figure is shown in stereo.

## Construction of the point mutants

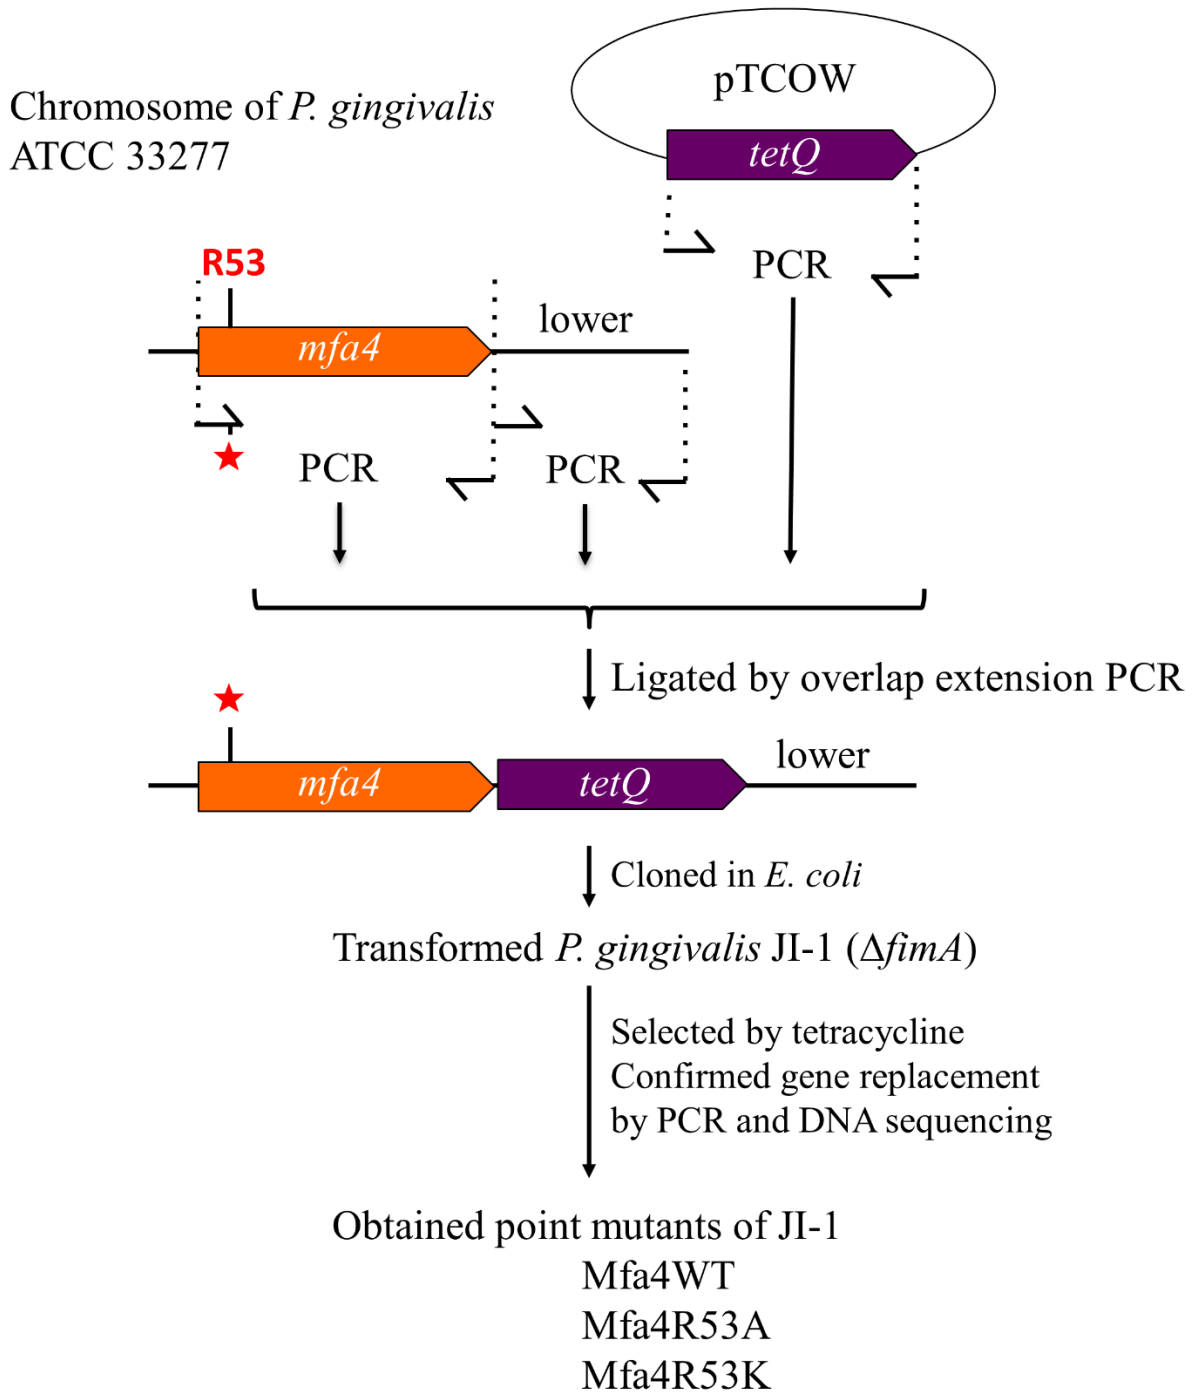

**Supplementary figure S3.** Construction of point mutants in *mfa4* of *P. gingivalis*. Small

arrows show the primers. R, arginine residue; star, alanine or lysine residues.

## Construction of the double point mutant

Chromosome of *P. gingivalis*

Mfa4R53A

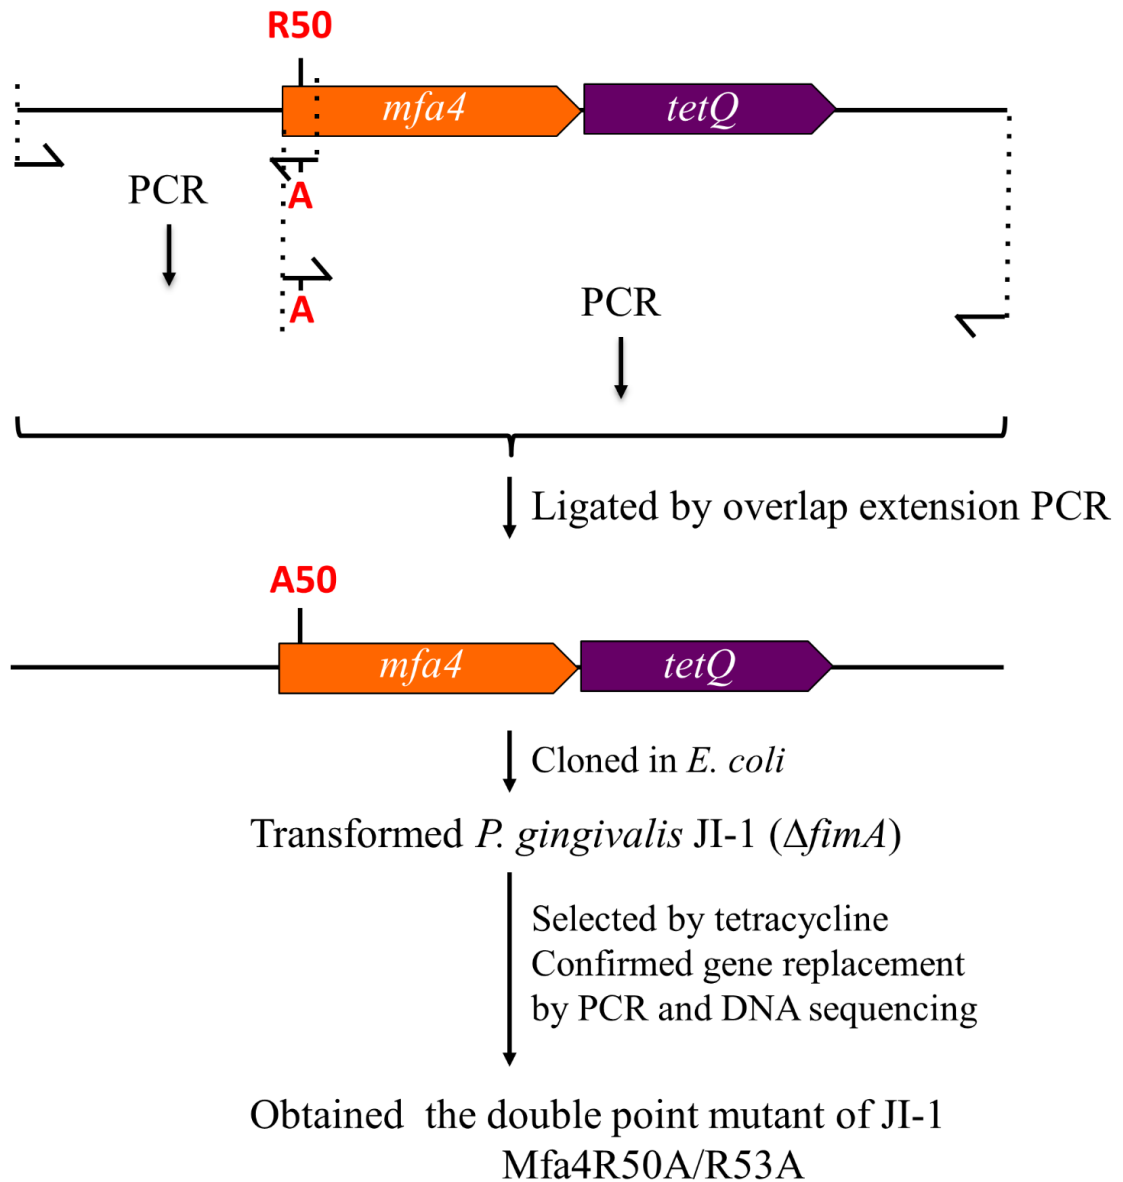

**Supplementary figure S4.** Construction of the double point mutant in *mfa4* of *P. gingivalis*.

Small arrows show the primers. R, arginine residue; A, alanine residue.

Table S1 Primers used for generation of expression constructs and point mutants.

| Primer         | Sequence (5'-3')                                                  | Description of underline                                            |
|----------------|-------------------------------------------------------------------|---------------------------------------------------------------------|
| Mfa4mature     | TGATACCATGGCTAATCAAGGAAGTGCTGCC                                   | <i>NcoI</i> site                                                    |
| Mfa4precursor  | TTTTTCCATGGAGCCGGTGGAAGACAGA                                      | <i>NcoI</i> site                                                    |
| Mfa4 C-term    | TTTTTGGTACCTCAAATCTCGACTTCGTA                                     | <i>Acc65I</i> site                                                  |
| TetQF          | ACTTACCAGTTGAACCTACGTTTCC                                         |                                                                     |
| TetQR          | CTTATAGAAATTTCTGACCGCTCC                                          |                                                                     |
| Mfa4WTFU       | GACAGTACGCTATGAAAGGAATCAAGGAAG<br>TGCTGCCGAAAGGCTCATTACCAATC      |                                                                     |
| Mfa4R53AFU     | GACAGTACGCTATGAAGCGAATCAAGGAAG<br>TGCTGCCGAAAGGCTCATTACCAATC      | Ala mutation                                                        |
| Mfa4R53KFU     | GACAGTACGCTATGAAAAGAATCAAGGAAG<br>TGCTGCCGAAAGGCTCATTACCAATC      | Lys mutation                                                        |
| Mfa4RU         | GGAAACGTAGGTTCAACTGGTAAGTTCAAA<br>TCTCGACTTCGTA                   | Overlapping region of 5' end of <i>tetQ</i>                         |
| Mfa4FD         | GGAGCGGTCAGGAAATTTCTATAAGTATTTT<br>TTAGGTCTTGTT TGATATTGTG GAAGAG | Overlapping region of 3' end of <i>tetQ</i>                         |
| Mfa4RD         | CGAAGACTGGTCGATAACCATCACCACATC                                    |                                                                     |
| Mfa4R50AR53 AF | GACAGTAGCCTATGAAGCGAATCAAGGAAG<br>TGCTGCCGAAAGGCTCATTACCAATC      | Ala mutations and overlapping region of 3' end of upstream fragment |
| Mfa4FU         | GAGTAGGTGCCACGAACCAATGG                                           |                                                                     |
| Mfa4R50AR53 AR | GATTCGCTTCATAGGCTACTGTC                                           | Ala mutations                                                       |
